# Supplementary material
Source: HighWire-hosted journal article supplement (https://www.cmajopen.ca/highwire/filestream/87282/field_highwire_adjunct_files/1/open-2021-0054-orion-checklist.pdf)
Supplement: open-2021-0054-orion-checklist.pdf [file open-2021-0054-orion-checklist.pdf]

## ORION Checklist of items to include when reviewing an outbreak report (OR) or intervention study (IS) of a nosocomial organism

| Topic                      | Item number | Descriptor                                                                                                                                                                                                                                                                                   | Is item in manuscript?<br><br>(page numbers reference clean version)                                      |
|----------------------------|-------------|----------------------------------------------------------------------------------------------------------------------------------------------------------------------------------------------------------------------------------------------------------------------------------------------|-----------------------------------------------------------------------------------------------------------|
| Title & Abstract           | 1           | Is paper described as an outbreak report (OR) or intervention study (IS)? Is design of IS described? Is Intervention & main outcomes described?                                                                                                                                              | Yes<br><br>In title – page 1<br>In abstract – page 2                                                      |
| Introduction<br>Background | 2           | Are background and rationale for IS/OR explained?<br>Is organism described as epidemic, endemic?                                                                                                                                                                                             | Yes<br><br>In introduction – page 3                                                                       |
| Type of paper              | 3           | Is paper described as IS or OR?<br>If OR, is number of outbreaks given?                                                                                                                                                                                                                      | Yes<br><br>In introduction – page 3                                                                       |
| Dates                      | 4           | Are start & finish dates of IS or OR given?                                                                                                                                                                                                                                                  | Yes<br><br>In introduction – page 3                                                                       |
| Objectives                 | 5           | Are objectives stated for OR? Are hypotheses stated for IS?                                                                                                                                                                                                                                  | Yes<br><br>In introduction – page 3                                                                       |
| Methods<br>Design          | 6           | Is study design described? How?<br>Is study described as retrospective, prospective or ambidirectional?<br>Does it state if decision to report or intervene prompted by any outcome data or not?<br>Is it stated if study formally implemented or not, with predefined protocol & endpoints? | Yes<br><br>In methods “study design” – page 3                                                             |
| Participants               | 7           | Is number patients admitted given?<br>Is age & length of stay given?<br>Are eligibility criteria for IS or case definitions for OR given?<br>Is proportion inter/intra-hospital transfers or admissions from care homes given?*                                                              | Yes<br><br>In methods “case definition” – page 3<br>In results – page 6                                   |
| Setting                    | 8           | Is unit, ward or hospital (and its units) described?<br>Are number of beds, presence and staffing of infection control team given?                                                                                                                                                           | N/A – not a nosocomial outbreak<br><br>Setting is described in methods “setting and population” on page 3 |
| Interventions              | 9           | Are phases defined by major change in specific infection control practice (with start & stop dates)?<br>Is a summary table given, with details of interventions, their delivery and timing given?                                                                                            | N/A – not a nosocomial outbreak                                                                           |
| Culturing & Typing         | 10          | Are details of culture media, antibiograms and/or typing given?                                                                                                                                                                                                                              | N/A – not a nosocomial outbreak                                                                           |

|                                        |    |                                                                                                                                                                                                                                                                                                                                                                                                                                                                                                                                                     |                                                                                |
|----------------------------------------|----|-----------------------------------------------------------------------------------------------------------------------------------------------------------------------------------------------------------------------------------------------------------------------------------------------------------------------------------------------------------------------------------------------------------------------------------------------------------------------------------------------------------------------------------------------------|--------------------------------------------------------------------------------|
|                                        |    | Are details environmental sampling given?*                                                                                                                                                                                                                                                                                                                                                                                                                                                                                                          |                                                                                |
| Infection-related outcomes             | 11 | <p>Are there clearly defined primary&amp; secondary outcomes?</p> <p>Are they given at regular time intervals ?</p> <p>Are there sufficient time points per phase? (see ORION author's checklist)?</p> <p>Are denominators given (eg admissions, discharges, bed days)?</p> <p>Is all cause mortality given?</p> <p>Is prevalence organism, or incidence of colonisation on admission at same time intervals*?</p> <p>In a short IS or OR is a chart used with duration patient stay &amp; dates detection of organism ? (see author checklist)</p> | N/A – not a nosocomial outbreak                                                |
| Economic outcomes                      | 12 | <p>Is this a formal economic study?</p> <p>If so, are outcomes defined? Are resources (for interventions) described? Are costs in basic units? Are assumptions stated?.</p>                                                                                                                                                                                                                                                                                                                                                                         | N/A – no economic outcomes included                                            |
| Potential Threats to internal validity | 13 | <p>Which potential confounders were considered, recorded or adjusted for?(eg: length of stay, case mix, occupancy, staffing levels, hand-hygiene,, antibiotic use, strain type, processing of isolates, seasonality).</p> <p>Are measures to avoid bias described? (eg blinding; standardisation outcome assessment/provision of care).</p>                                                                                                                                                                                                         | N/A – not an analytic study, but potential limitations are described on page 9 |
| Sample size                            | 14 | Are power calculations given? (if appropriate)                                                                                                                                                                                                                                                                                                                                                                                                                                                                                                      | N/A – not an analytic study                                                    |
